# Supplementary material for: Comparative Effectiveness of Microdecompression Alone vs Decompression Plus Instrumented Fusion in Lumbar Degenerative Spondylolisthesis
Source: PubMed Central journal article supplement (PMC7489859; doi:10.1001/jamanetworkopen.2020.15015), 2020-09-10
Supplement: jamanetwopen-e2015015-s001.pdf [file jamanetwopen-e2015015-s001.pdf]

## Supplementary Online Content

Austevoll IM, Gjestad R, Solberg T, et al. Comparative effectiveness of microdecompression alone vs decompression plus instrumented fusion in lumbar degenerative spondylolisthesis. *JAMA Netw Open*. 2020;3(9):e2015015. doi:10.1001/jamanetworkopen.2020.15015

**eTable 1.** Surgical Parameters for the Unmatched Cohort and for the Propensity Score–Matched Cohort

**eTable 2.** Outcome Scores for the Unmatched Cohort

**eTable 3.** Responses on the Global Perceived Effect Scale for the Propensity Score–Matched Cohort

**eTable 4.** Outcomes for the Propensity Score–Matched Cohort Following Multiple Imputation of Missing Data

This supplementary material has been provided by the authors to give readers additional information about their work.

**eTable 1. Surgical Parameters for the Unmatched Cohort and for the Propensity Score–Matched Cohort**

|                                                 | Unmatched cohort                  |                                                | Propensity score matched cohort   |                                                |
|-------------------------------------------------|-----------------------------------|------------------------------------------------|-----------------------------------|------------------------------------------------|
|                                                 | Microdecompression alone<br>N=476 | Decompression and instrumented fusion<br>N=318 | Microdecompression alone<br>N=285 | Decompression and instrumented fusion<br>N=285 |
|                                                 | No. (%)                           |                                                |                                   |                                                |
| Operated with magnifying devices                | 476 (100)                         | 211 (66)                                       | 285 (100)                         | 183 (64)                                       |
| Operated on level L2/L3                         | 15 (3)                            | 9 (3)                                          | 7 (3)                             | 9 (3)                                          |
| Operated on level L3/L4                         | 142 (30)                          | 89 (38)                                        | 88 (31)                           | 83 (29)                                        |
| Operated on level L4/L5                         | 387 (81)                          | 261 (82)                                       | 235 (82)                          | 235 (82)                                       |
| Operated on level L5/S1                         | 34 (7)                            | 31 (10)                                        | 25 (9)                            | 23 (8)                                         |
| One level operated                              | 372 (78)                          | 240 (75)                                       | 214 (75)                          | 216 (76)                                       |
| Two levels operated                             | 104 (22)                          | 78 (25)                                        | 71 (25)                           | 69 (24)                                        |
| Laminectomy                                     | 0                                 | 201 (63)                                       | 0                                 | 180 (63)                                       |
| Midline preserving decompression                | 476 (100)                         | 117 (37)                                       | 285 (100)                         | 105 (37)                                       |
| -unilateral decompression                       | 86 (18)                           | 17 (5)                                         | 58 (20)                           | 14 (05)                                        |
| -bilateral decompression                        | 306 (64)                          | 31 (10)                                        | 188 (66)                          | 26 (9)                                         |
| -bilateral decompression, unilateral approach   | 84 (18)                           | 69 (2)                                         | 39 (14)                           | 65 (23)                                        |
| Posterolateral instrumented fusion without cage | 0                                 | 205 (64)                                       | 0                                 | 189 (66)                                       |
| Posterolateral interbody fusion (PLIF)          | 0                                 | 9 (3)                                          | 0                                 | 9 (3)                                          |
| Transforaminal interbody fusion (TLIF)          | 0                                 | 104 (33)                                       | 0                                 | 87 (31)                                        |

Abbreviation: N, number of patients with complete data

All data collected from surgeon forms. **Numbers (%) of total (N) are given.**

**eTable 2.** Outcome Scores for the Unmatched Cohort

|               |           | Micro-decompression alone |             | Decompression and instrumented fusion |             |                    | Difference (95% CI) <sup>a</sup> | P value <sup>a</sup> |
|---------------|-----------|---------------------------|-------------|---------------------------------------|-------------|--------------------|----------------------------------|----------------------|
|               |           | N                         | Mean (SD)   | N                                     | Mean        | (SD)               |                                  |                      |
| ODI           | 3 months  | 351                       | 20.1 (18.2) | 230                                   | 21.7 (16.0) | -1.6 (-4.5 to 1.3) | .28                              |                      |
|               | 12 months | 346                       | 20.6 (17.9) | 224                                   | 21.0 (17.7) | -0.5 (-3.4 to 2.5) | .76                              |                      |
| NRS leg pain  | 3 months  | 346                       | 2.9 (2.9)   | 220                                   | 2.2 (2.6)   | 0.7 (-0.3 to 1.2)  | .002                             |                      |
|               | 12 months | 343                       | 3.4 (3.1)   | 228                                   | 2.8 (2.9)   | 0.6 (0.1 to 1.1)   | .02                              |                      |
| NRS back pain | 3 months  | 348                       | 3.3 (2.7)   | 224                                   | 3.3 (2.4)   | 0.1 (-0.4 to 0.5)  | .76                              |                      |
|               | 12 months | 348                       | 3.6 (2.9)   | 233                                   | 3.4 (2.6)   | 0.2 (-0.2 to 0.7)  | .32                              |                      |

Abbreviations: SD, standard deviation; N, number of patients for analysis; CI, confidence interval; ODI, Oswestry Disability Index (ranges from 0 to 100, with higher scores indicating more disability); NRS, Numeric rating scale (ranges from 0 to 10, with higher scores indicating more pain).

<sup>a</sup>Two-sided tests for superiority. Unadjusted analyses.

**eTable 3. Responses on the Global Perceived Effect Scale for the Propensity Score–Matched Cohort**

|                                         | <b>Micro-decompression alone (N=218)</b> | <b>Decompression and instr. fusion (N=217)</b> | Difference (95% CI) <sup>c</sup> | <i>P</i> value <sup>d</sup> |
|-----------------------------------------|------------------------------------------|------------------------------------------------|----------------------------------|-----------------------------|
| Replies                                 | No. (%)                                  |                                                |                                  |                             |
| “Completely recovered”                  | 51 (23)                                  | 49 (23)                                        |                                  | .72                         |
| “Much improved”                         | 94 (43)                                  | 105 (48)                                       |                                  |                             |
| “Slightly improved”                     | 45 (21)                                  | 43(20)                                         |                                  |                             |
| “Unchanged”                             | 12 (5.5)                                 | 5 (2.3)                                        |                                  |                             |
| “Slightly worse”                        | 7 (3.2)                                  | 7 (3.2)                                        |                                  |                             |
| “Much worse”                            | 5 (2.3)                                  | 5 (2.3)                                        |                                  |                             |
| “Worse than ever”                       | 4 (1.8)                                  | 3 (1.4)                                        |                                  |                             |
| Substantially improved <sup>a</sup>     | 145 (67)                                 | 154 (71)                                       | –4% (–13 to 4)                   | .32                         |
| Substantially deteriorated <sup>b</sup> | 9 (4)                                    | 8 (4)                                          | 0% (–3 to 4)                     | .81                         |

Abbreviations: N, number of patients completed the **Global Perceived Effect questionnaire at 12 months**.

<sup>a</sup> Patients rated themselves as ‘completely recovered’ or ‘much improved’.

<sup>b</sup> Patients rated themselves as ‘much worse’ or ‘worse than ever’.

<sup>c</sup> The absolute difference (microdecompression alone minus decompression and instrumented fusion).

<sup>d</sup> Pearson’s Chi-square test

**eTable 4. Outcomes for the Propensity Score–Matched Cohort Following Multiple Imputation of Missing Data**

|                      | Micro-decompression<br>alone (N=285) | Decompression and<br>instrumented fusion (N=285) | Difference <sup>a</sup> |         |
|----------------------|--------------------------------------|--------------------------------------------------|-------------------------|---------|
|                      | Mean (SD)                            | Mean (SD)                                        | Mean (95% CI)           | P value |
| <b>ODI</b>           |                                      |                                                  |                         |         |
| Change 0-3 months    | −20.0 (17.6)                         | −19.2 (18.4)                                     | −0.9 (−4.6 to 2.9)      | .65     |
| Change >3-12 months  | 0.73 (12.7)                          | −0.9 (14.4)                                      | 1.6 (−1.3 to 4.5)       | .28     |
| 12-month follow-up   | 22.0 (18.2)                          | 20.8 (17.7)                                      | 1.2 (−2.6 to 5.0)       | .53     |
| <b>NRS leg pain</b>  |                                      |                                                  |                         |         |
| Change 0-3 months    | −3.7 (3.2)                           | −4.4 (3.3)                                       | 0.7 (0.1 to 1.3)        | .02     |
| Change >3-12 months  | 0.4 (2.7)                            | 0.5 (2.7)                                        | −0.03 (−0.6 to 0.5)     | .91     |
| 12-month follow-up   | 3.5 (3.0)                            | 2.8 (3.0)                                        | 0.7 (0.1 to 1.4)        | .03     |
| <b>NRS back pain</b> |                                      |                                                  |                         |         |
| Change 0-3 months    | −3.3 (2.9)                           | −3.5 (2.9)                                       | 0.3 (−0.4 to 0.9)       | .43     |
| Change >3-12 months  | 0.4 (2.5)                            | 0.1 (2.6)                                        | 0.3 (−0.2 to 0.8)       | .25     |
| 12-month follow-up   | 3.9 (2.9)                            | 3.4 (2.6)                                        | 0.5 (−0.07 to 1.0)      | .08     |

The mean change scores (SD) from baseline to 3-month follow-up and from 3- to 12-month follow-up (negative values indicate improvement) and the mean follow-up scores (SD) at 12-month follow-up, estimated with multi-sample Latent Growth Curve models.

Abbreviations: SD, standard deviation; N, number of patients for analysis; CI, confidence interval; ODI, Oswestry Disability Index (ranges from 0 to 100, with higher scores indicating more disability), NRS, Numeric rating scale (ranges from 0 to 10, with higher scores indicating more pain).

<sup>a</sup>Microdecompression alone minus decompression and instrumented fusion. 95% CIs and 2-sided tests for superiority.
